# Supplementary material for: Factors Associated with Inadequate Intravenous Colistin Dosages: Post Hoc Analysis of a Multicenter, Cross-Sectional Study
Source: MDPI journal article supplement (doi:10.3390/antibiotics10121554), 2021-12-19
Supplement: s1 [file s1]

## **Adequate colistin dosage in patients not undergoing hemodialysis according to recommendations at the time of the study\* [1]**

Loading dose:

- 9 million international units (MIU)

Maintenance dosage (daily, divided in 2-3 doses) according to creatinine clearance (CrCL):

- CrCL  $\geq 50$  ml/min: 9 MIU
- CrCL  $< 50$ -30 ml/min: 5.5-7.5 MIU
- CrCL  $< 30$ -10 ml/min: 4.5-5.5 MIU
- CrCL  $< 10$  ml/min: 3.5 MIU

\* The study was conducted before the release of the International Guidelines for the Optimal Use of the Polymyxins [2]

### **References**

1. European Medicines Agency completes review of polymyxin-based medicines. Recommendations issued for safe use in patients with serious infections resistant to standard antibiotics. Annex III [last accessed 21 Nov 2021]. [https://www.ema.europa.eu/documents/referral/polymyxin-article-31-referral-annex-iii\\_en.pdf](https://www.ema.europa.eu/documents/referral/polymyxin-article-31-referral-annex-iii_en.pdf).
2. Tsuji, B.T.; Pogue, J.M.; Zavascki, A.P.; Paul, M.; Daikos, G.L.; Forrest, A.; Giacobbe, D.R.; Viscoli, C.; Giamarellou, H.; Karaikos, I., et al. International Consensus Guidelines for the Optimal Use of the Polymyxins: Endorsed by the American College of Clinical Pharmacy (ACCP), European Society of Clinical Microbiology and Infectious Diseases (ESCMID), Infectious Diseases Society of America (IDSA), International Society for Anti-infective Pharmacology (ISAP), Society of Critical Care Medicine (SCCM), and Society of Infectious Diseases Pharmacists (SIDP). *Pharmacotherapy* **2019**, 39, 10-39, doi:10.1002/phar.2209.
